# Supplementary material
Source: publisher site journal article supplement (https://fesmj.pensoft.net/article/download/suppl/5366687/)
Supplement: Supplementary file 1

defaultSimulation
minD1;2
modeD1;6
maxD1;13
minD4;1
modeD4;2
maxD4;4
minD5;7
modeD5;48
maxD5;72
minD6;1
modeD6;5
maxD6;24
minD8;1
modeD8;24
maxD8;72
minD10;1
modeD10;24
maxD10;336
minT1;29
modeT1;30
maxT1;35
minT4;25
modeT4;27
maxT4;30
minT5;28
modeT5;30
maxT5;33
minT6;25
modeT6;27
maxT6;30
minT8;20
modeT8;25
maxT8;30
minT10;6
modeT10;15
maxT10;30
sim;2000
prevalence;0.1
freqcuisson;0.9
